# Supplementary figures and images for: A porous hybrid imprinted membrane for selectively anchoring target proteins from a complex matrix
Source: Royal Society of Chemistry journal article supplement (doi:10.1039/c5ra11966a), 2015-01-01

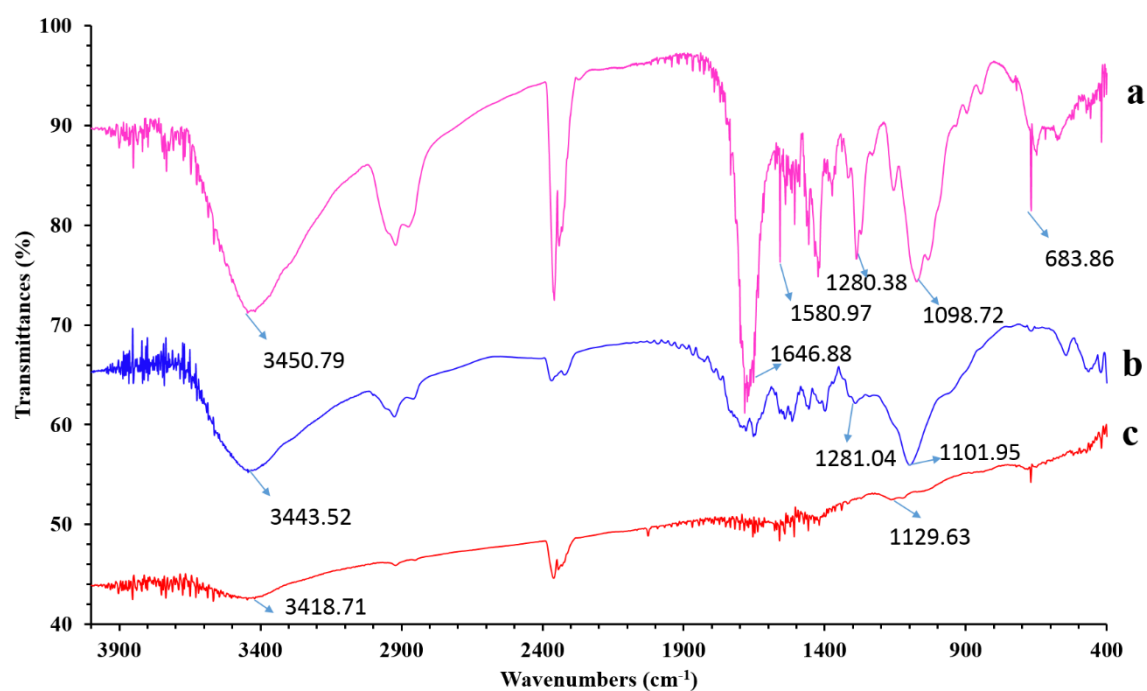

**Supplementary information Fig. 1** FTIR spectra of CP/CNT/DA-MIM (a), CP-MIM (b) and activated MWCNT (c).

Supplement: c5ra11966a1.pdf [file c5ra11966a1.pdf]
